# Supplementary material for: Green STEM to Improve Mathematics Proficiency: ESA Mission Space Lab
Source: MDPI journal article supplement (doi:10.3390/math9172066), 2021-08-26
Supplement: s1 [file s1]

# European Astro Pi Challenge

## Mission Space Lab **WINNER**

**Congratulations!**

**This is to certify that**

**mentor of team**

**from**

**mentored one of the winning teams of the Astro Pi Challenge Mission Space Lab 2018–2019 organised by ESA in collaboration with the Raspberry Pi Foundation.**

**Your team's experiment ran on the International Space Station in spring 2019!**

**Hugo Marée**  
Head of Education Office



**Philip Colligan**  
CEO of Raspberry Pi Foundation

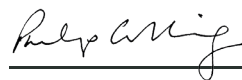

**Alexander Gerst**  
ESA Astronaut

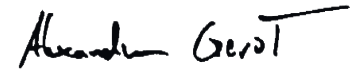

Their experiment ran during these orbits:

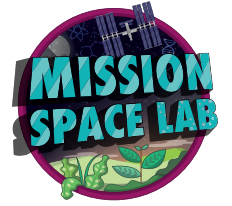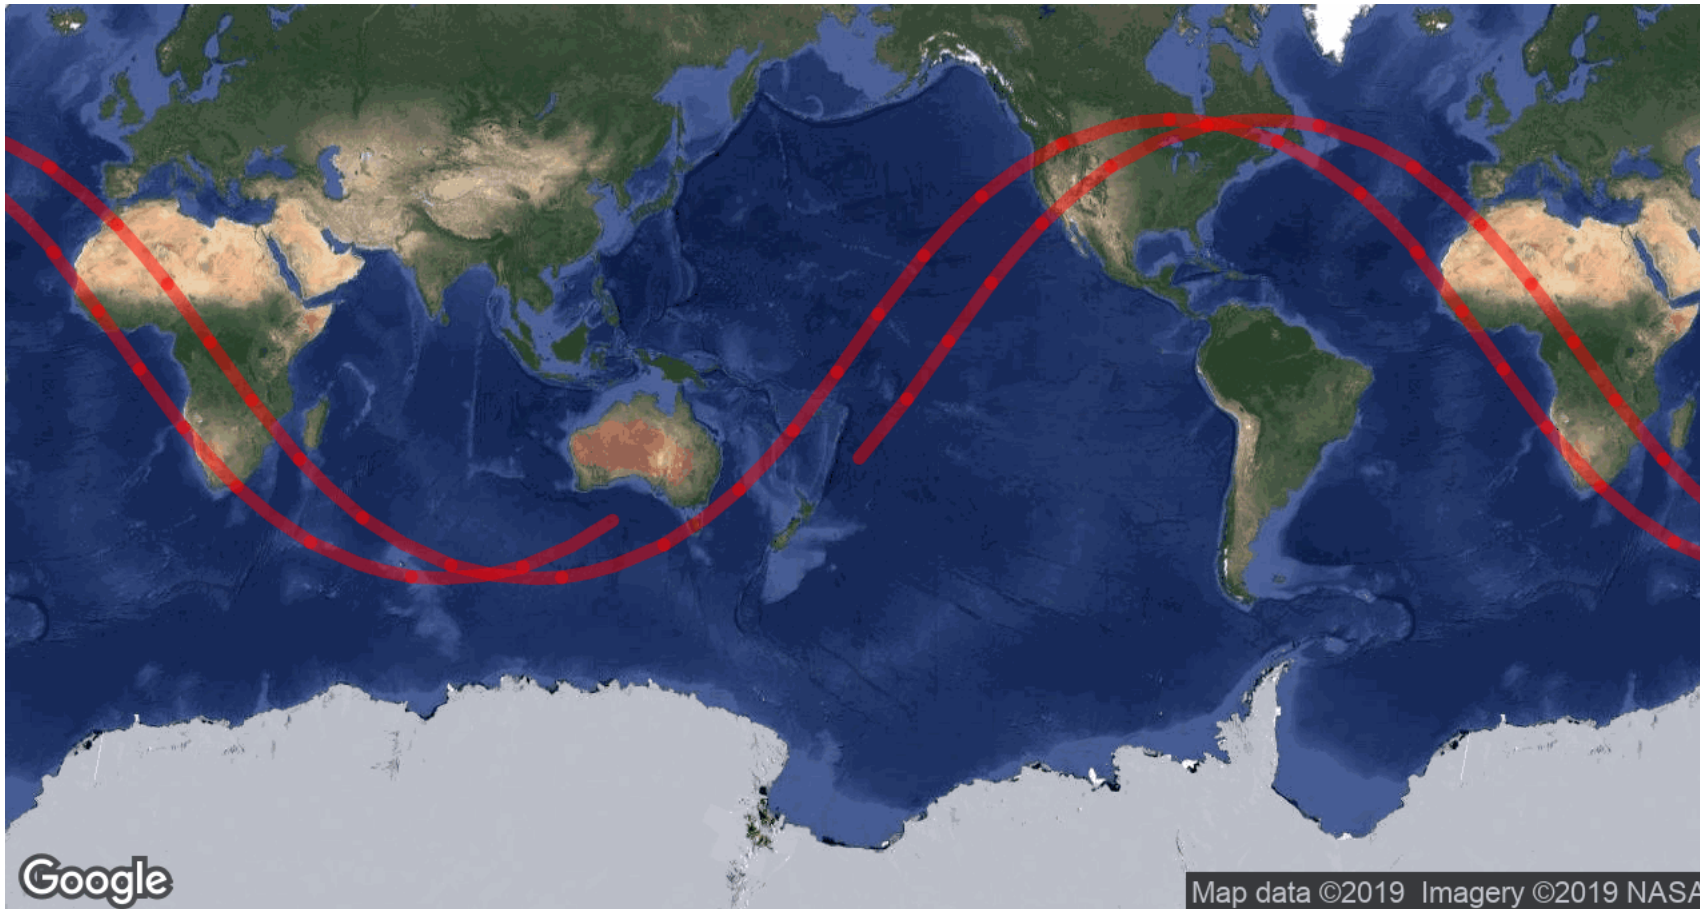

It ran from

to
